# Supplementary material
Source: HighWire-hosted journal article supplement (https://bmjopen.bmj.com/content/11/7/e047380)
Supplement: inline-supplementary-material-9 [file inline-supplementary-material-9.pdf]

Supplementary Table S3: Protocol Amendment History – Tea Tree Oil tungiasis Trial

| Amendment No | Protocol version No | Date issued | Author(s) of changes | Details of changes made |
|--------------|---------------------|-------------|----------------------|-------------------------|
| 1            | Version 1           | 2019        | Solomon Abrha Bezabh | Original version        |
|              |                     |             |                      |                         |
